# Supplementary material
Source: MDPI journal article supplement (https://www.mdpi.com/2072-4292/13/9/1834)
Supplement: s1 [file s1]

## Supplementary Materials

A R program for calculating NLME model assessment results and different subsample calibration results, using leave-one-site-out cross-validation.

```
setwd("E:/R/Remote sensing")
d<-read.csv('HCB.csv',header=T)
library(nlme)
library(Matrix)

ErrorStatistics<-function(Est,Obs){
  Index<-array(dim=4)
  Bias<-sum(Obs-Est)/length(Obs)
  EBias<-(sum(Obs-Est)/length(Obs))/mean(Obs)
  MAE<-abs(sum(Obs-Est))/length(Obs)
  EMAE<-(abs(sum(Obs-Est))/length(Obs))/mean(Obs)
  Index[1]<-Bias
  Index[2]<-EBias
  Index[3]<-MAE
  Index[4]<-EMAE
  dimnames(Index)<-list(c("Bias","EBias","MAE","EMAE"))
  return(Index)
}

Fun<-expression(H*(1-exp(b0+u01+u11+(b1+u02+u12)*CW+b2*CCp75+b3*H99)))
predictionResult = d
predictionResult$PredFixed = NaN
predictionResult$PredSiteLevel = NaN
predictionResult$PredSitePlotLevel = NaN

# leave-one-site-out cross-validation of NLME model
for (i in unique(d$Ref_Site)) {
  sampledata <-d[d$Ref_Site %in% i,]      #Extract the i-th site
  modeling_data <-d[!d$Ref_Site %in% i,]    #Extract the sites except the i-th site
  nlm2<-nlme(HCB~H*(1-exp(b0+b1*CW+b2*CCp75+b3*H99)),
    fixed=b0+b1+b2+b3~1,
    random=list(Ref_Site=pdLogChol(b0+b1~1),Ref_PLOT=pdLogChol(b0+b1~1)),
    start=c(b0=-0.1, b1=0.05, b2=-0.1,b3=-0.05),
    data= modeling_data,
    weights = varPower(form = ~H),
    method = 'REML')

  # fixed parameters
  p<-nlm2$coefficients$fixed
```

```

b0<-p[1]
b1<-p[2]
b2<-p[3]
b3<-p[4]
u01 = u02 = u11 = u12 = 0

CW <- sampledata $CW
H   <- sampledata $H
CCp75 <- sampledata $CCp75
H99 <- sampledata $H99
HCB<- sampledata $HCB

predictionResult$PredFixed[predictionResult$Ref_Site==i] = eval(Fun) #Fixed prediction

# R calculation
qq <- nlm2$modelStruct$varStruct
ee<-as.matrix(HCB-eval(Fun))
temp<-H^(qq*2)
Gmatrix<-diag(temp)
R<-(nlm2$sigma^2)*sqrt(Gmatrix)%*%diag(rep(1,length(H)))*%*%sqrt(Gmatrix)

# Z/G calculation by plot iteration
f11<-D(Fun,'u01')
f12<-D(Fun,'u02')
f21<-D(Fun,'u11')
f22<-D(Fun,'u12')

SiteZ = matrix(nrow = 0,ncol = 2)
PlotZ = matrix(nrow = 0, ncol = 0)

# random-effect variance-covariance matrix
G2 <- as.matrix(cov(nlm2$coefficients$random$Ref_Site))
G1 <- as.matrix(cov(nlm2$coefficients$random$Ref_PLOT))

Site_i_AllPlot = unique(sampledata $Ref_PLOT)

for (j in Site_i_AllPlot){
  G = as.matrix(bdiag(G,G1))
  Site_i_Plot_j <- subset(sampledata, Ref_PLOT==j)
  CW <- Site_i_Plot_j $CW
  H   <- Site_i_Plot_j $H
  CCp75 <- Site_i_Plot_j $ CCp75
  H99 <- Site_i_Plot_j $H99
  HCB<- Site_i_Plot_j $HCB

```

```

    z11<-eval(f11)
    z12<-eval(f12)
    z21<-eval(f21)
    z22<-eval(f22)
    SiteZ = rbind(SiteZ,cbind(z11,z12))
    PlotZ = as.matrix(bdiag(PlotZ,cbind(z21,z22)))
  }

  Z = cbind(SiteZ,PlotZ)
  A <- Z%%G%%t(Z)+R
  u <- G%%t(Z)%%solve(A)%%ee

  u01 <- u[1]
  u02 <- u[2]

  for (x in 1:length(Site_i_AllPlot)){
    u11 = u12 = 0
    Site_i_Plot_x <- subset(sampledata, Ref_PLOT==Site_i_AllPlot[x])

    CW <- Site_i_Plot_x $CW
    H   <- Site_i_Plot_x $H
    CCp75 <- Site_i_Plot_x $CCp75
    H99 <- Site_i_Plot_x $H99
    HCB<- Site_i_Plot_x $HCB

    predictionResult$PredSiteLevel[predictionResult$Ref_PLOT==Site_i_AllPlot[x]] =
      eval(Fun) #SiteLevel prediction

    u11 <- u[(x-1)*2+1+2]
    u12 <- u[(x-1)*2+2+2]

    predictionResult$PredSitePlotLevel[predictionResult$Ref_PLOT==Site_i_AllPlot[x]] =
      eval(Fun)      #SitePlotLevel prediction
  }
}

#Error Statistics
ErrorStatistics(predictionResult$PredSitePlotLevel, predictionResult$HCB) # calibrated
ErrorStatistics(predictionResult$PredFixed, predictionResult$HCB) # un-calibrated

# Comparison of different sampling strategies (for example, sampling the largest tree (type II))
predictionResult1 = d
predictionResult1$PredSitePlotLevel = NaN

```

```

r<-matrix(nrow=18,ncol=4) #CalibrationResult
for (k in c(1:18)) {
  for (i in unique(d$Ref_Site)) {
    sampledata <-d[d$Ref_Site %in% i,]      #Extract the i-th site
    modeling_data <-d[!d$Ref_Site %in% i,]    #Extract the sites except the i-th site
    nlm2<-nlme(HCB~H*(1-exp(b0+b1*CW+b2*CCp75+b3*H99)),
              fixed=b0+b1+b2+b3~1,
              random=list(Ref_Site=pdLogChol(b0+b1~1),Ref_PLOT=pdLogChol(b0+b1~1)),
              start=c(b0=-0.1, b1=0.05, b2=-0.1,b3=-0.05),
              data= modeling_data,
              weights = varPower(form = ~H),
              method = 'REML')

    subsampledata <-data.frame()
    for (j in unique(sampledata $Ref_PLOT)) {
      Plot_j = sampledata [sampledata $Ref_PLOT%in%j,]
      Plot_j1<-Plot_j[order(-Plot_j$DBH),]
      Plot_j1<-Plot_j1[1:k,]
      subsampledata = rbind(subsampledata, Plot_j1)
    }
    p<-nlm2$coefficients$fixed
    b0<-p[1]
    b1<-p[2]
    b2<-p[3]
    b3<-p[4]
    u01 = u02 = u11 = u12 = 0

    CW <- subsampledata $CW
    H   <- subsampledata $H
    CCp75 <- subsampledata $CCp75
    H99 <- subsampledata $H99
    HCB<- subsampledata $HCB

    # R calculation
    qq <- nlm2$modelStruct$varStruct
    ee<-as.matrix(HCB-eval(Fun))
    temp<-H^(qq*2)
    Gmatrix<-diag(temp)
    R<-(nlm2$sigma^2)*sqrt(Gmatrix)%*%diag(rep(1,length(H)))*%*%sqrt(Gmatrix)

    # Z/G calculation by plot iteration
    f11<-D(Fun,'u01')
    f12<-D(Fun,'u02')
    f21<-D(Fun,'u11')

```

```
f22<-D(Fun,'u12')
```

```
SiteZ = matrix(nrow = 0,ncol = 2)
```

```
PlotZ = matrix(nrow = 0, ncol = 0)
```

```
G2 <- as.matrix(cov(nlm2$coefficients$random$Ref_Site))
```

```
G1 <- as.matrix(cov(nlm2$coefficients$random$Ref_PLOT))
```

```
G = G2
```

```
Site_i_AllPlot = unique(subsampledata $Ref_PLOT)
```

```
for (x in Site_i_AllPlot){
```

```
  G = as.matrix(bdiag(G,G1))
```

```
  Subsampledata_Plot_x <- subset(subsampledata, Ref_PLOT==x)
```

```
  CW <- Subsampledata_Plot_x $CW
```

```
  H   <- Subsampledata_Plot_x $H
```

```
  CCP75 <- Subsampledata_Plot_x $CCp75
```

```
  H99 <- Subsampledata_Plot_x $H99
```

```
  HCB<- Subsampledata_Plot_x $HCB
```

```
  z11<-eval(f11)
```

```
  z12<-eval(f12)
```

```
  z21<-eval(f21)
```

```
  z22<-eval(f22)
```

```
  SiteZ = rbind(SiteZ,cbind(z11,z12))
```

```
  PlotZ = as.matrix(bdiag(PlotZ,cbind(z21,z22)))
```

```
}
```

```
Z = cbind(SiteZ,PlotZ)
```

```
A <- Z%*%G%*%t(Z)+R
```

```
u <- G%*%t(Z)%*%solve(A)%*%ee
```

```
u01 <- u[1]
```

```
u02 <- u[2]
```

```
for (xx in 1:length(Site_i_AllPlot)){
```

```
  u11 = u12 = 0
```

```
  Site_i_Plot_xx <- subset(sampledata, Ref_PLOT==Site_i_AllPlot[xx])
```

```
  CW <- Site_i_Plot_xx $CW
```

```

H   <- Site_i_Plot_xx $H
CCp75 <- Site_i_Plot_xx $CCp75
H99 <- Site_i_Plot_xx $H99
HCB<- Site_i_Plot_xx $HCB
u11 <- u[(xx-1)*2+1+2]
u12 <- u[(xx-1)*2+2+2]
predictionResult1$PredSitePlotLevel[predictionResult1$Ref_PLOT==Site_i_AllPlot[xx]]
= eval(Fun)
    }
  }
  r[k,1]<-ErrorStatistics(predictionResult1$PredSitePlotLevel,predictionResult$HCB)[1]
  r[k,2]<-ErrorStatistics(predictionResult1$PredSitePlotLevel,predictionResult$HCB)[2]
  r[k,3]<-ErrorStatistics(predictionResult1$PredSitePlotLevel,predictionResult$HCB)[3]
  r[k,4]<-ErrorStatistics(predictionResult1$PredSitePlotLevel,predictionResult$HCB)[4]
}

```
